# Supplementary figures and images for: Exploration of the Mechanism of Linoleic Acid Metabolism Dysregulation in Metabolic Syndrome
Source: Hindawi journal article supplement (doi:10.1155/2022/6793346), 2022-11-28

A

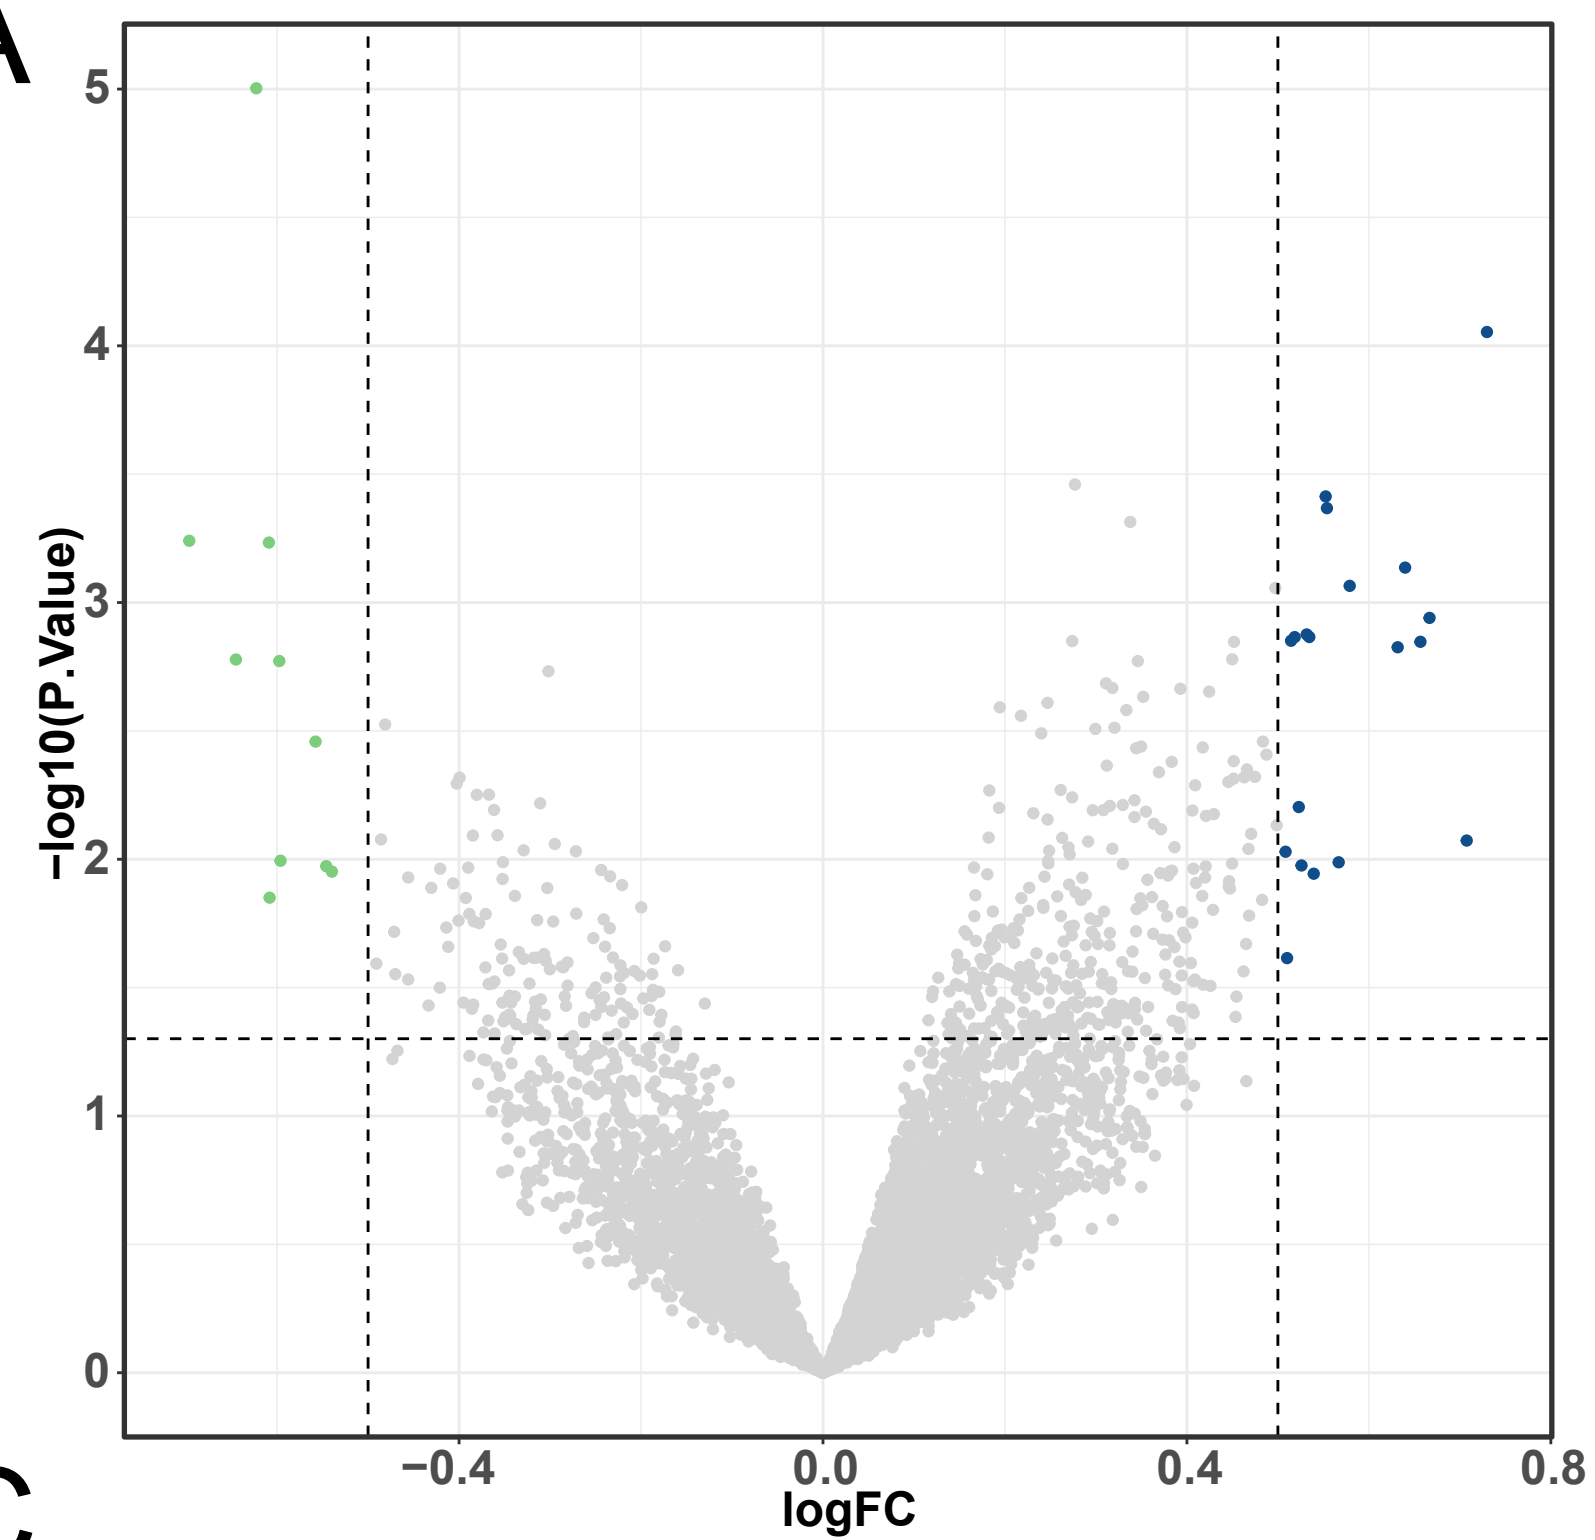

B

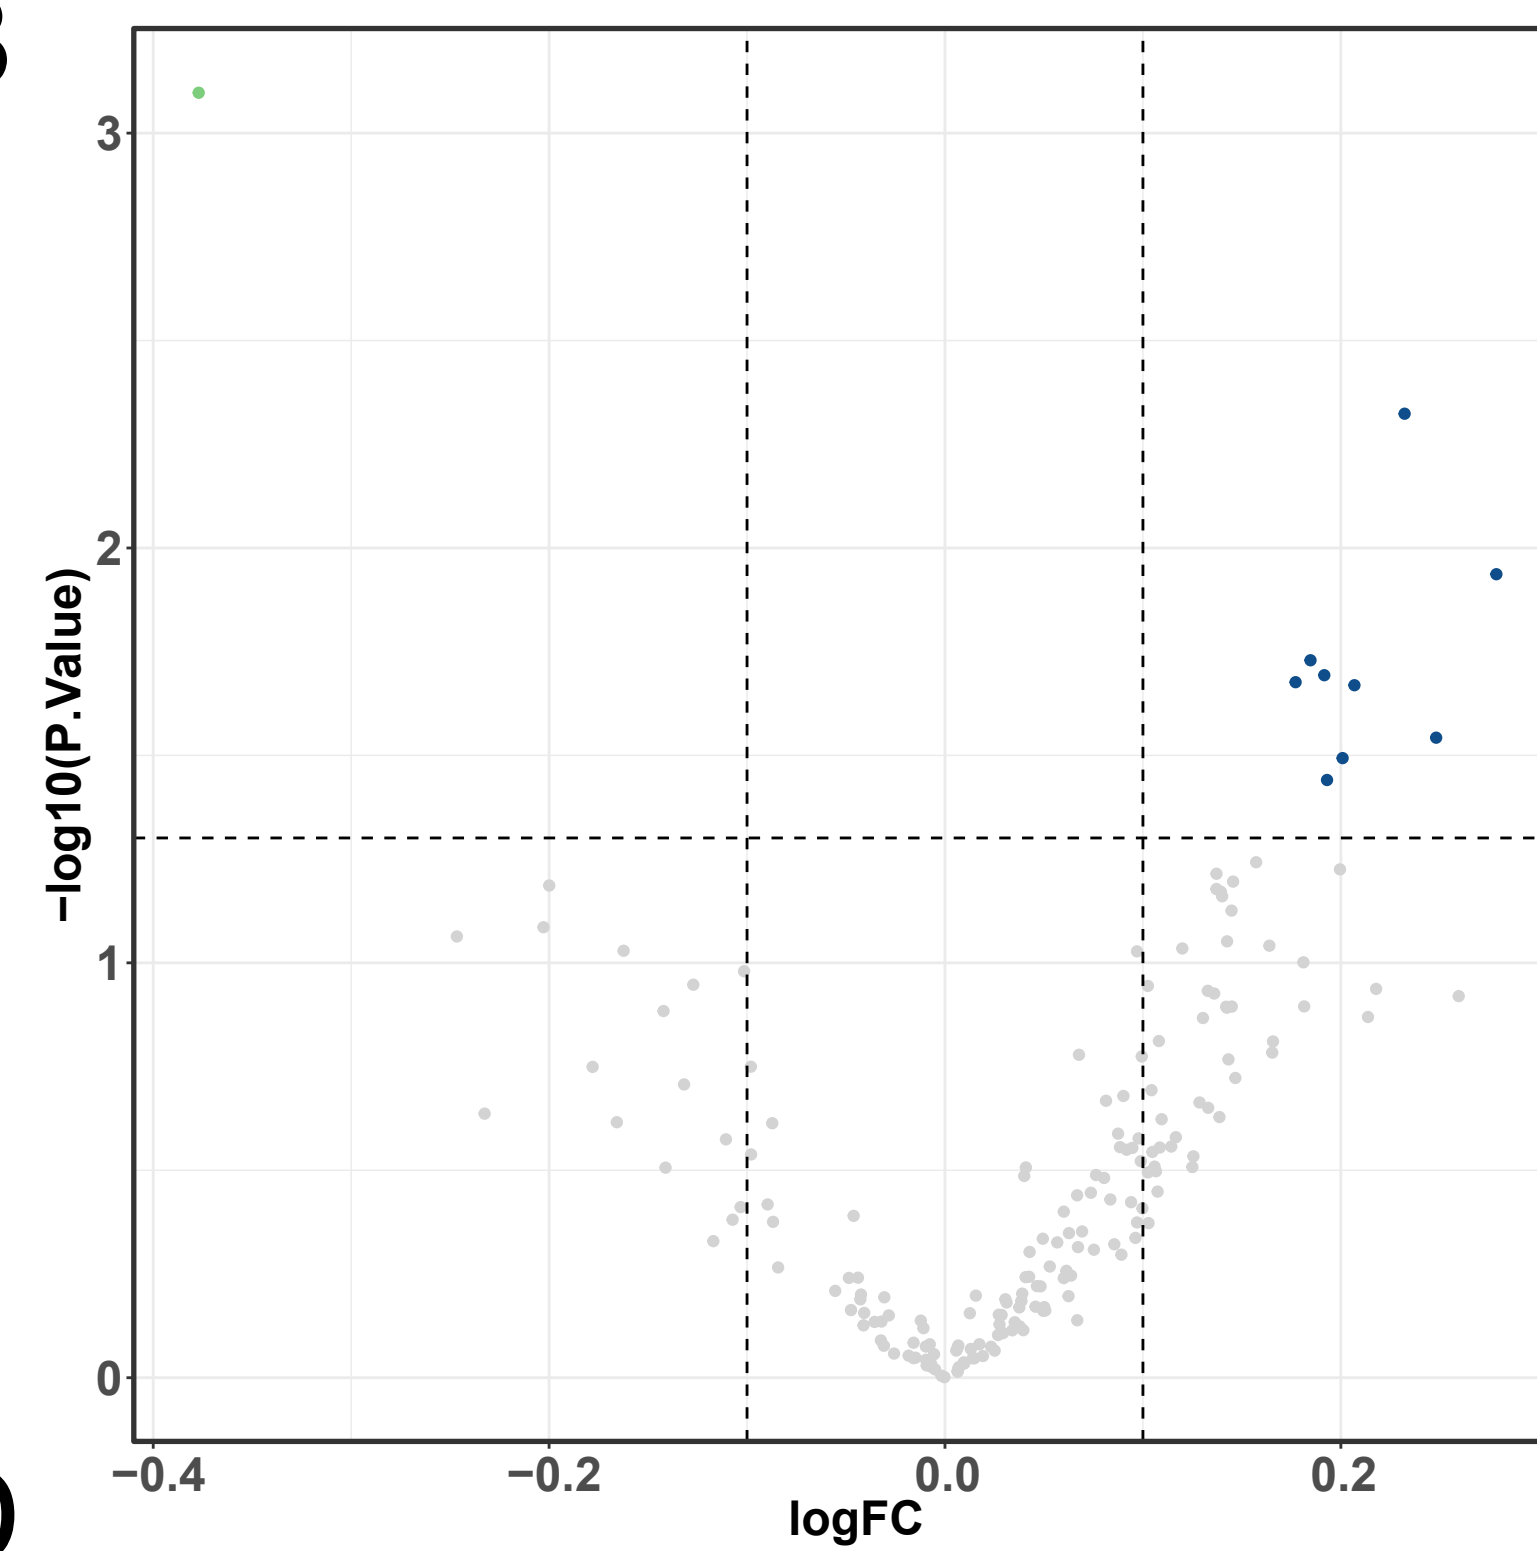

C

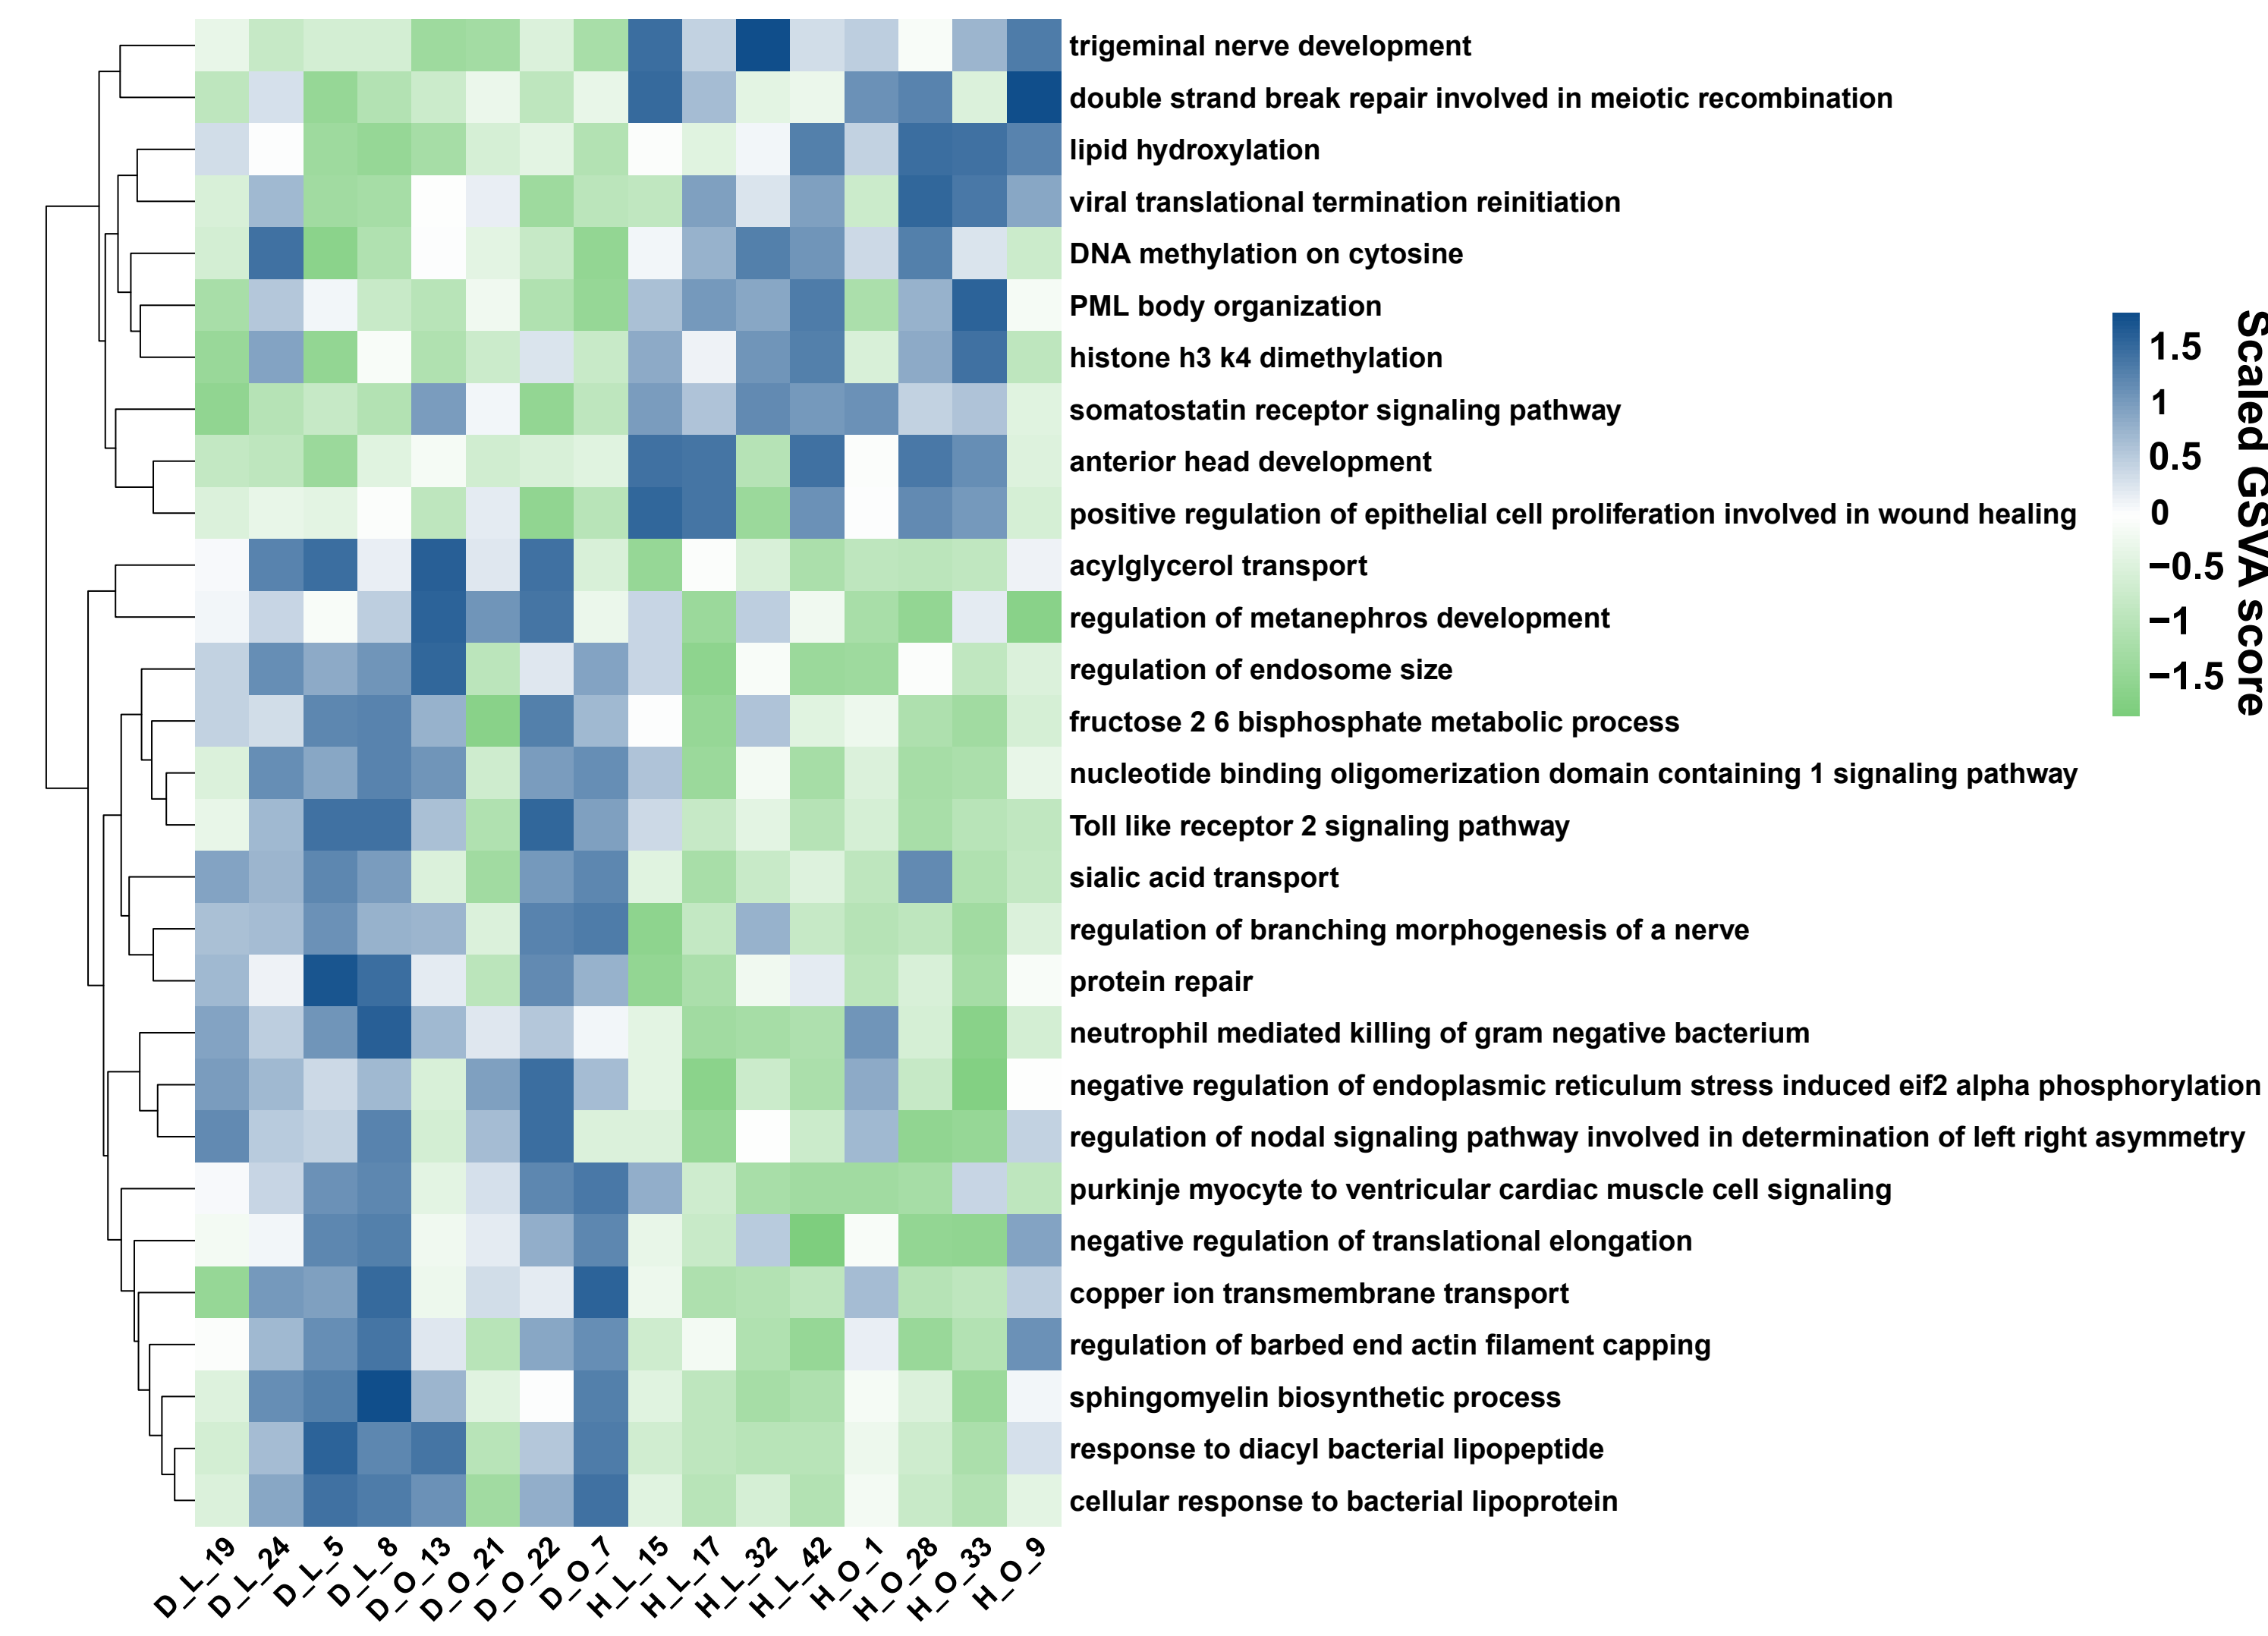

D

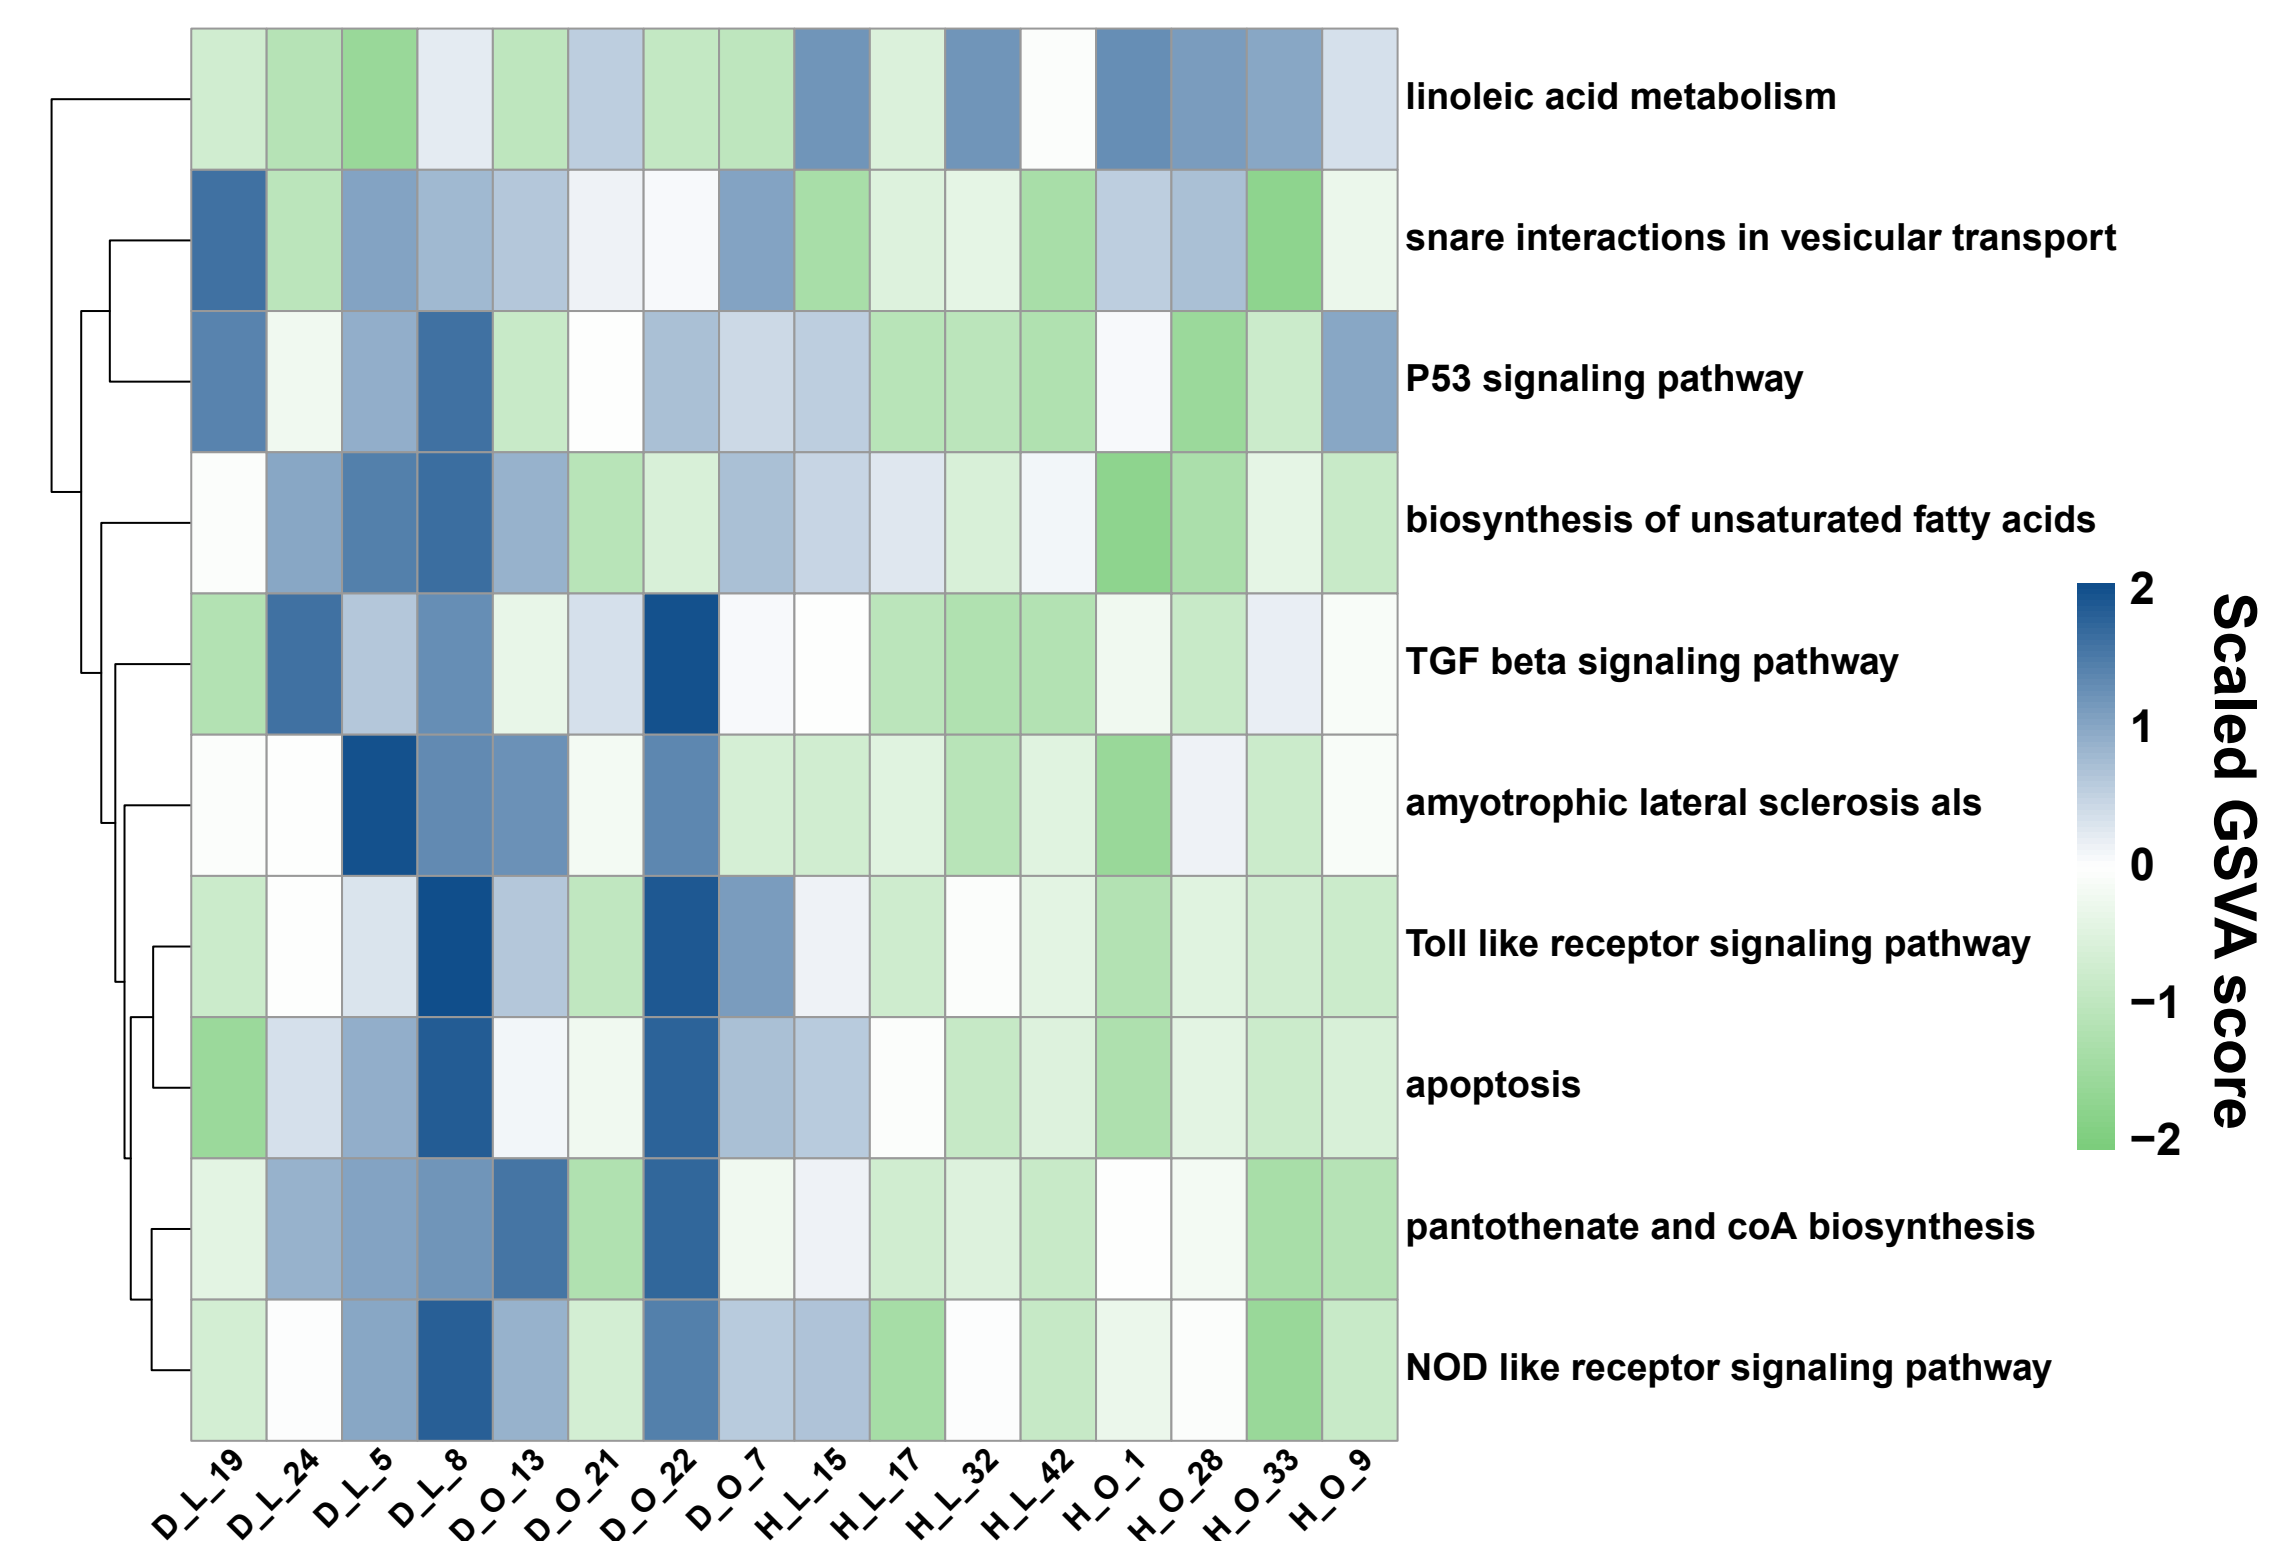

Supplement: f1 [file 6793346.f1.zip]

# B

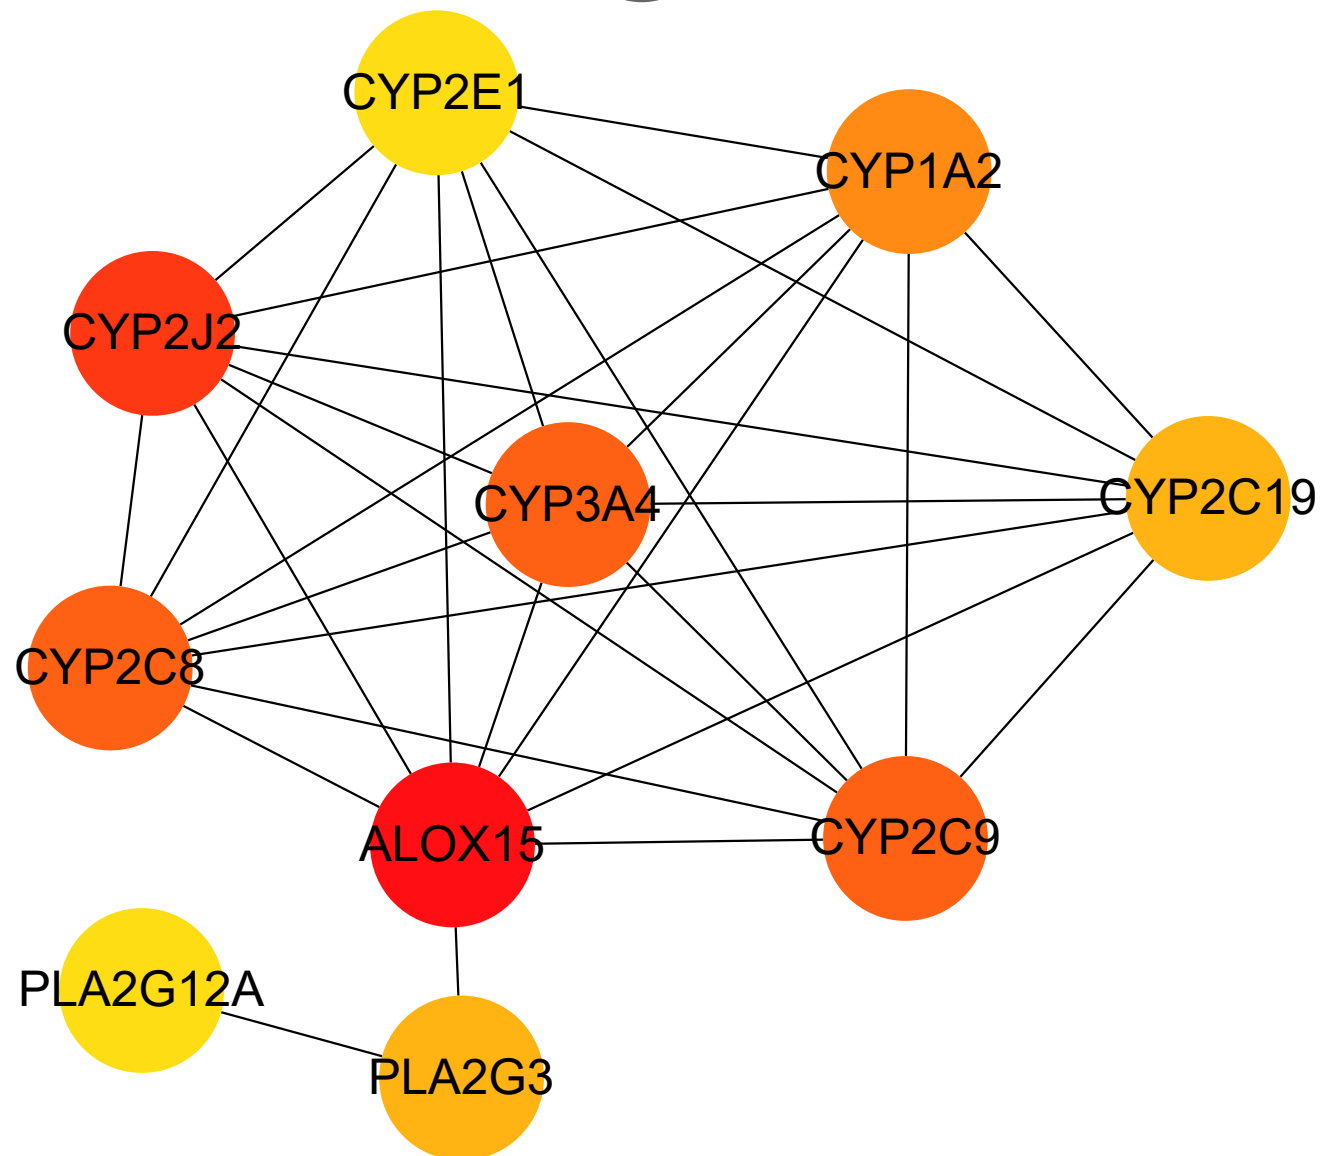

Supplement: f1 [file 6793346.f1.zip]
